# Supplementary material for: Bactericidal Chitosan Derivatives and Their Superabsorbent Blends with ĸ-Carrageenan
Source: MDPI journal article supplement (doi:10.3390/ijms25084534), 2024-04-20
Supplement: s1 [file s1]

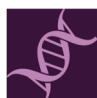

Supplementary Materials

# Bactericidal Chitosan Derivatives and Their Superabsorbent Blends with $\kappa$ -Carrageenan

Kamila Lewicka <sup>1</sup>, Anna Smola-Dmochowska <sup>2</sup>, Natalia Śmigiel-Gac <sup>2</sup>, Bożena Kaczmarczyk <sup>2</sup>, Henryk Janeczek <sup>2</sup>, Renata Barczyńska-Felusiak <sup>1</sup>, Izabela Szymanek <sup>1</sup>, Piotr Rychter <sup>1</sup> and Piotr Dobrzyński <sup>1,2,\*</sup>

<sup>1</sup> Faculty of Science and Technology, Jan Długosz University in Częstochowa, 13/15 Armii Krajowej Av., 42-200 Częstochowa, Poland; k.lewicka@ujd.edu.pl (K.L.); r.barczyńska-felusiak@ujd.edu.pl (R.B.-F.); izabela.szymanek@doktorant.ujd.edu.pl (I.S.); p.rychter@ujd.edu.pl (P.R.)

<sup>2</sup> Centre of Polymer and Carbon Materials, Polish Academy of Sciences, 41-819 Zabrze, Poland; asmola@cmpw-pan.pl (A.S.-D.); ngac@cmpw-pan.pl (N.Ś.-G.); bkaczmarczyk@cmpw-pan.pl (B.K.); hjaneczek@cmpw-pan.pl (H.J.)

\* Correspondence: p.dobrzynski@ujd.edu.pl

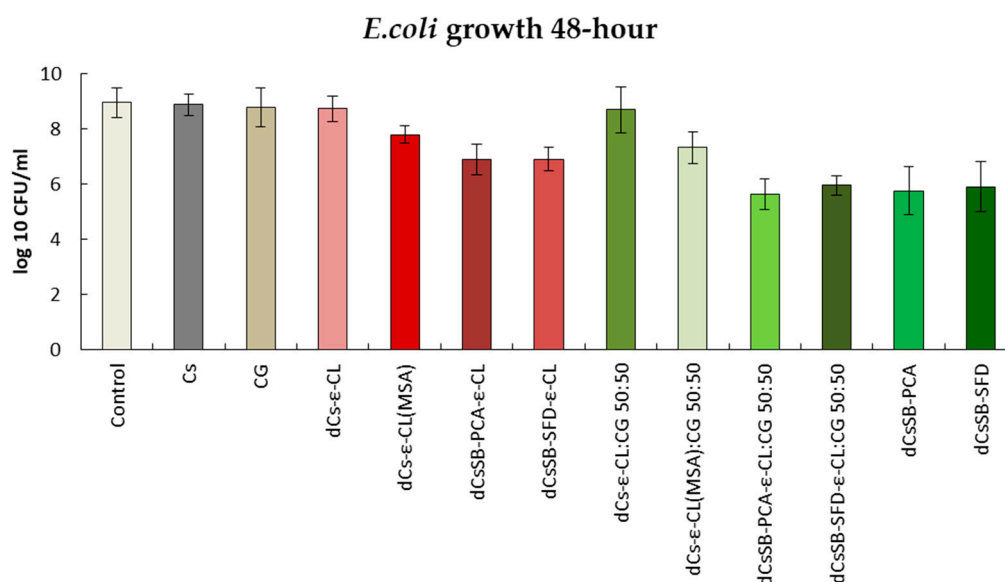

**Figure S1.** Summary of growth results for the *E. coli* for 48 h.

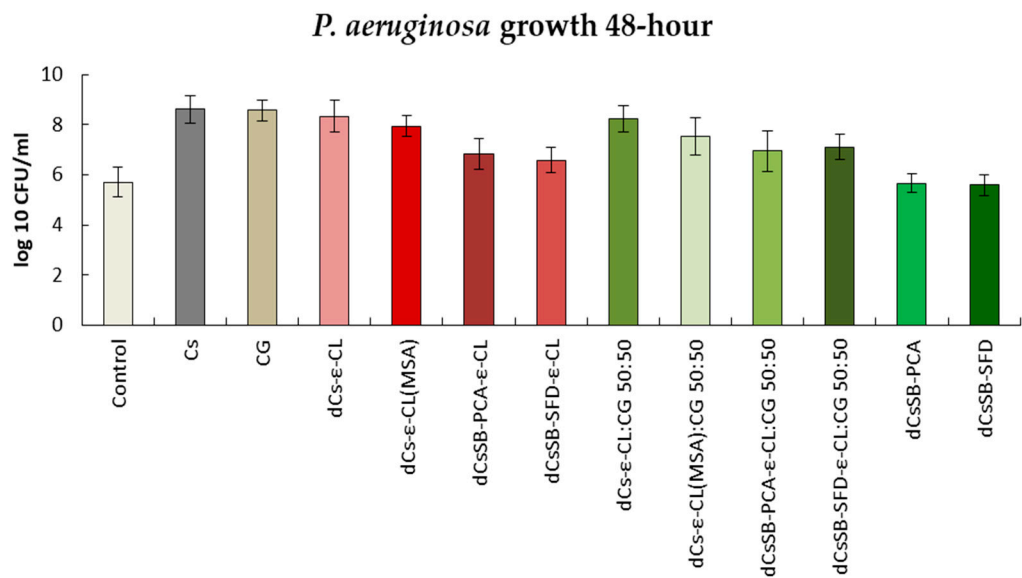

Figure S2. Summary of growth results for the *P.aeruginosa* for 48 h.

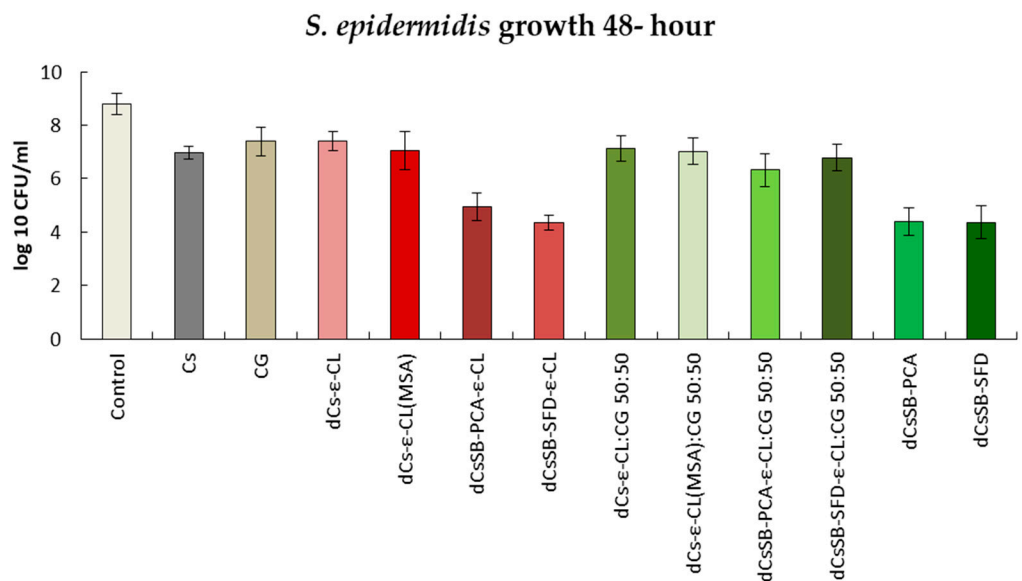

Figure S3. Summary of growth results for the *S. epidermidis* for 48 h.

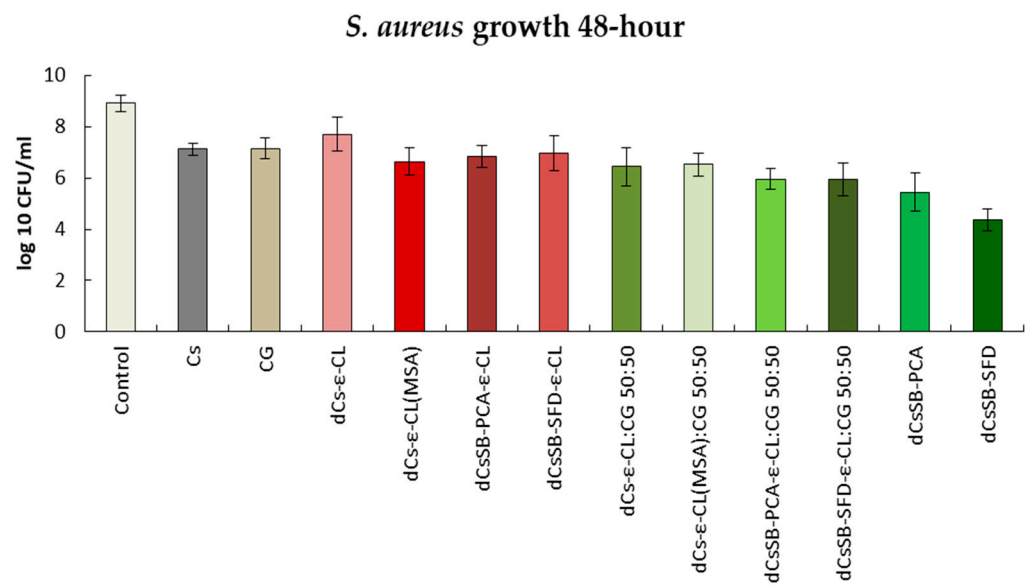

**Figure S4.** Summary of growth results for the *S. aureus* for 48 h.

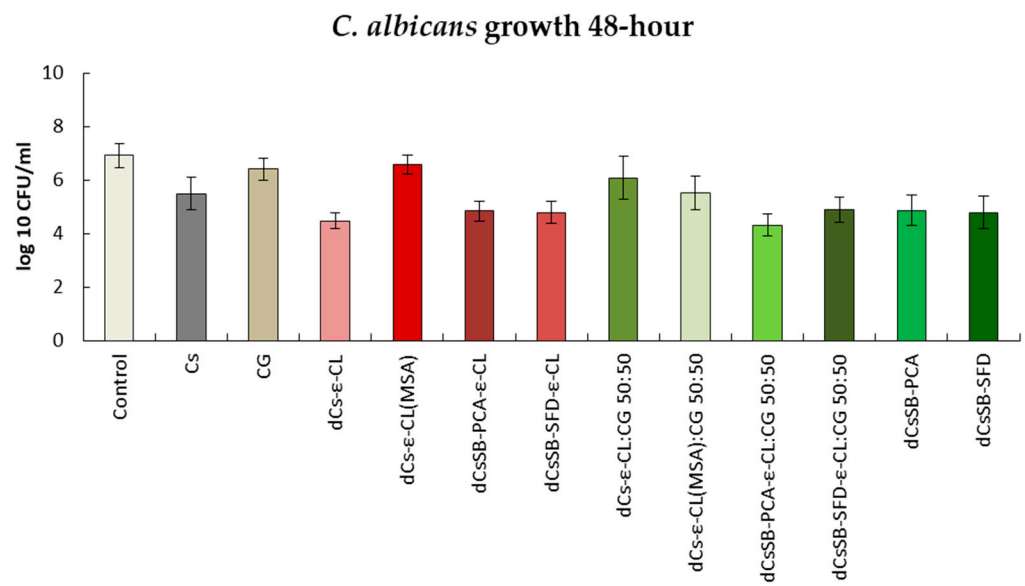

**Figure S5.** Summary of growth results for the *C. albicans* for 48 h.

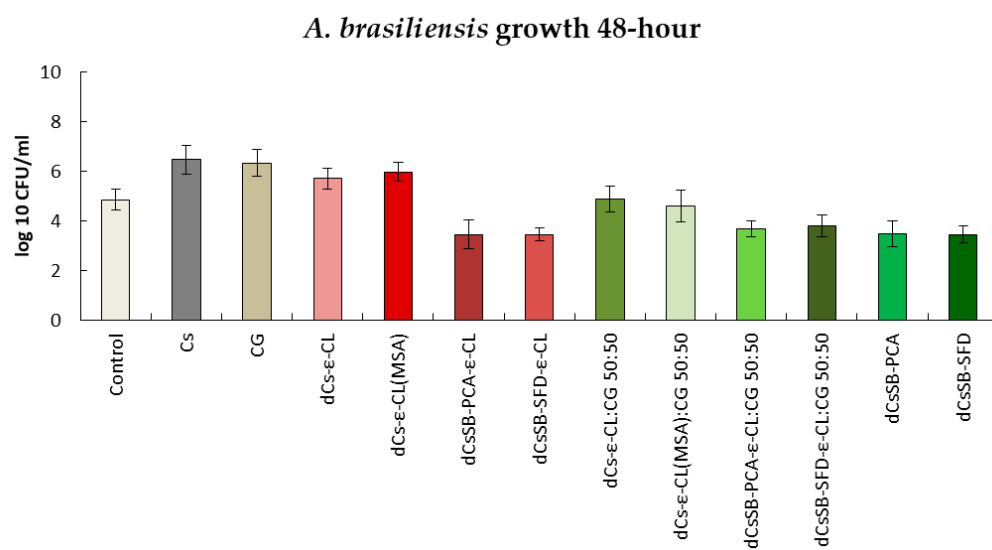

**Figure S6.** Summary of growth results for the *A. brasiliensis* for 48 h.
